# Supplementary material for: The T Cell Immunoscore as a Reference for Biomarker Development Utilizing Real-World Data from Patients with Advanced Malignancies Treated with Immune Checkpoint Inhibitors
Source: MDPI journal article supplement (doi:10.3390/cancers15204913), 2023-10-10
Supplement: s1 [file s1]

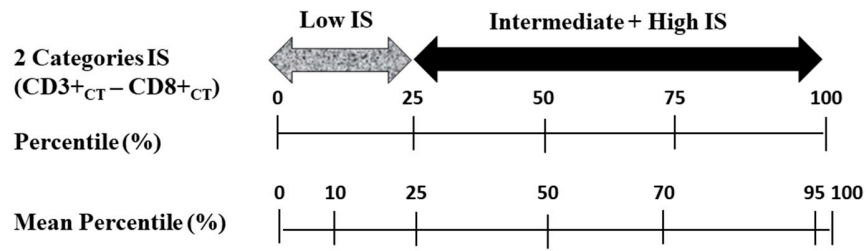

**Figure S1.** Immunoscoring calculation using two categories of “low” and “intermediate-high” using imputed densities of  $CD3^{+}_{CT}$  and  $CD8^{+}_{CT}$

**Abbreviation:** CD; cluster differentiation, CT; center of the tumor, IS; immunoscoring.

Adapted from Galon *et al.* [1].
